# Supplementary material
Source: Springer Nature journal article supplement (https://www.springermedizin.de/resource/supplementary/12936_2014_3716_MOESM2_ESM.pdf/9545266)
Supplement: MOESM2 [file 9545266]

- No intervention
- ▒ Repellent intervention
- Toxic intervention

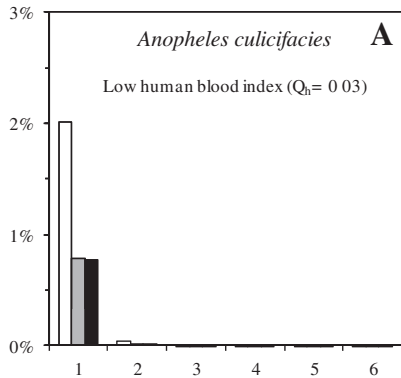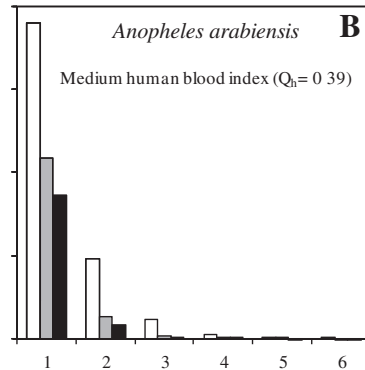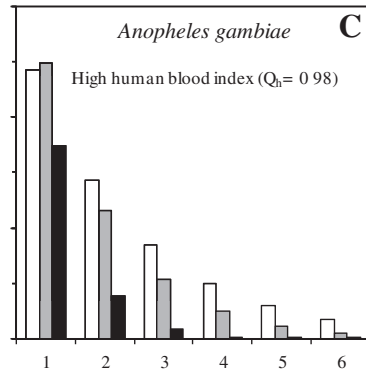

NUMBER OF HUMAN BLOOD MEALS PER MOSQUITO LIFETIME
